# Supplementary material
Source: publisher figshare collection journal article supplement (https://acs.figshare.com/ndownloader/files/17948441)
Supplement: Supplementary file 1 [file 17948441]

## Supporting Information

# The Destruction and Reorganization of Physically Cross-linked Network of Thermoplastic Polyurethane Depending on Its Glass Transition Temperature

*Xuke Li<sup>†\*</sup>, Hai Wang<sup>†</sup>, Bijin Xiong<sup>†</sup>, Elmar Pösel<sup>‡</sup>, Berend Eling<sup>‡</sup>, Yongfeng Men<sup>†</sup>*

<sup>†</sup>State Key Laboratory of Polymer Physics and Chemistry, Changchun Institute of Applied Chemistry, Chinese Academy of Sciences, Renmin Street 5625, 130022 Changchun, P.R. China.

<sup>‡</sup>BASF -Polyurethanes GmbH, Elastogranstrasse 60, 49448 Lemförde, Germany.

\*Corresponding Author: Xuke Li, Email: [lixuker@gmail.com](mailto:lixuker@gmail.com)

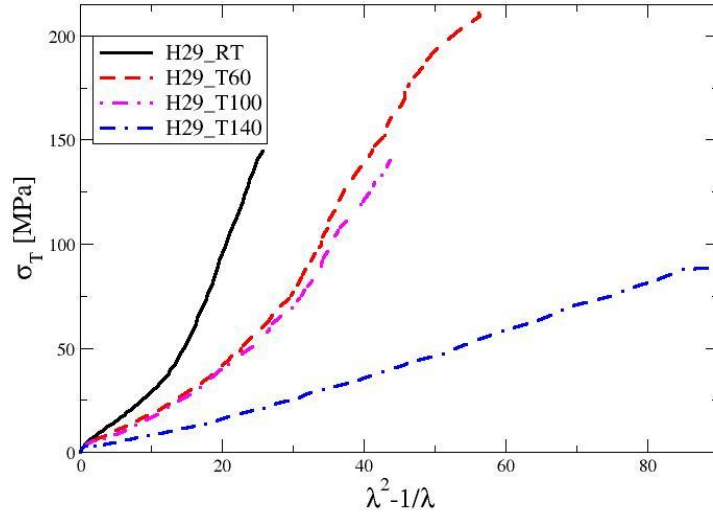

Figure S1. The stress-strain curve of TPU H29 deformed at different temperatures plotted in the form of  $\sigma_t$  vs.  $\lambda^2 - \lambda^{-1}$ .

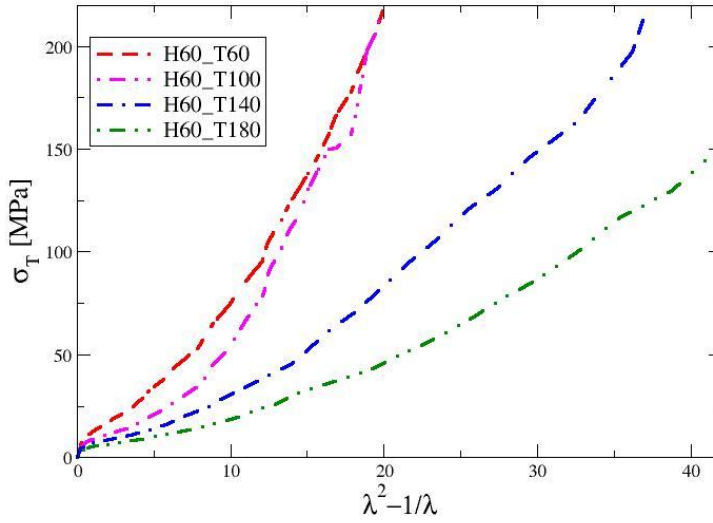

Figure S2. The stress-strain curve of TPU H60 deformed at different temperatures plotted in the form of  $\sigma_t$  vs.  $\lambda^2 - \lambda^{-1}$ .

Table S1.  $G_p$ , measured from the slope of the curve plotted in the form of  $\sigma_t$  vs.  $\lambda^2 - \lambda^{-1}$ , is shown as a function of the HSC and deformation temperature  $T$ .  $G_p = \rho RT / \langle M_c \rangle$

| $G_p$ /[MPa] | H29  | H42  | H60 |
|--------------|------|------|-----|
| T25          | 2.56 | 4.36 | --  |

|      |      |      |      |
|------|------|------|------|
| T60  | 1.70 | 2.50 | --   |
| T100 | 1.47 | 1.70 | 2.07 |
| T135 | 0.68 | 1.43 | 1.55 |
| T170 | --   | 0.89 | 1.14 |

Table S2. Average constraint molecular weight  $\langle M_c \rangle$  are shown as a function of the HSC and deformation temperature  $T$ .

| $\langle M_c \rangle$ (g/mol) | H29  | H42  | H60  |
|-------------------------------|------|------|------|
| T25                           | 1070 | 640  | --   |
| T60                           | 1720 | 1230 | --   |
| T100                          | 2120 | 1990 | 1610 |
| T135                          | 4830 | 2540 | 2240 |
| T170                          | --   | 4340 | 3210 |

Table S3. Maximum elongation  $\lambda_{max}$  of TPUs with different HSCs deformed at different temperatures. The  $\lambda_{max}$  is the average values of five independent measurements.

|      | H29 | H42 | H60 |
|------|-----|-----|-----|
| T25  | 5.2 | 5.9 | --  |
| T60  | 8.1 | 6.4 | --  |
| T100 | 8.7 | 7.6 | 4.6 |
| T135 | 8.2 | 7.8 | 6.1 |
| T170 | --  | 7.2 | 6.4 |

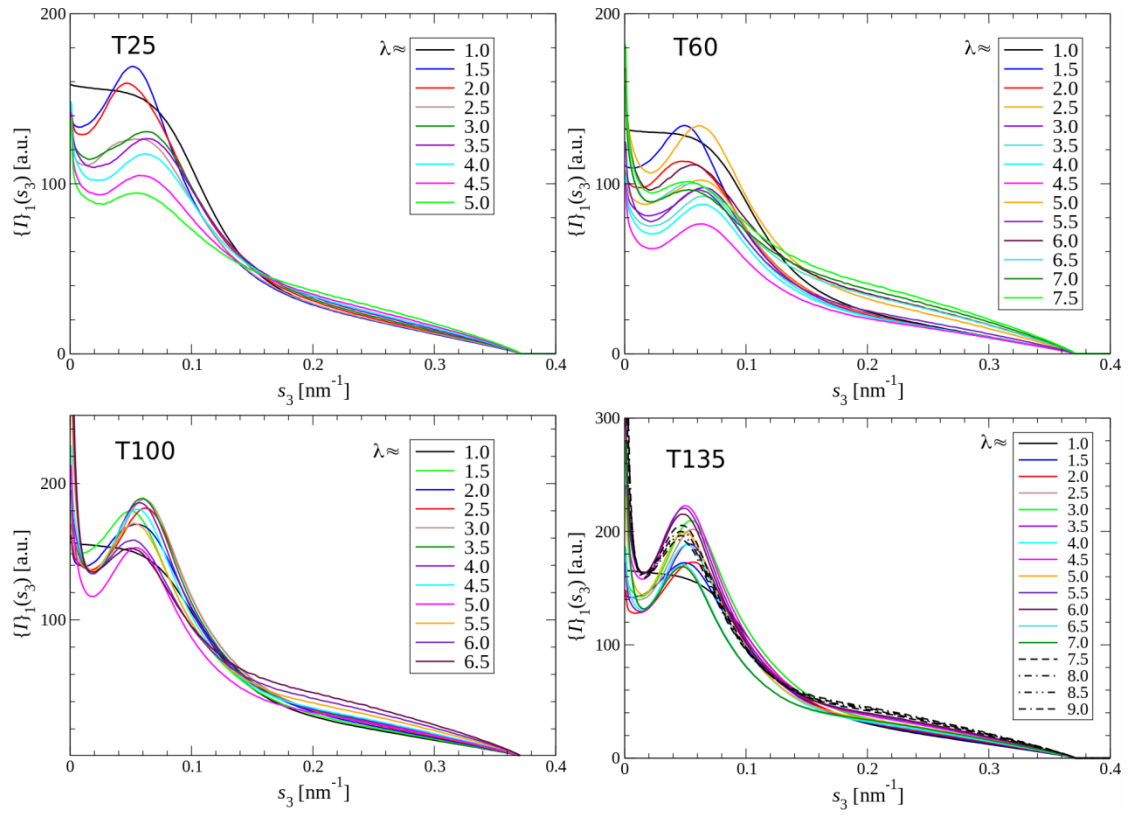

Figure S3: Vertical projection of SAXS pattern of sample H29 deformed at different temperatures varying as a function of elongation.

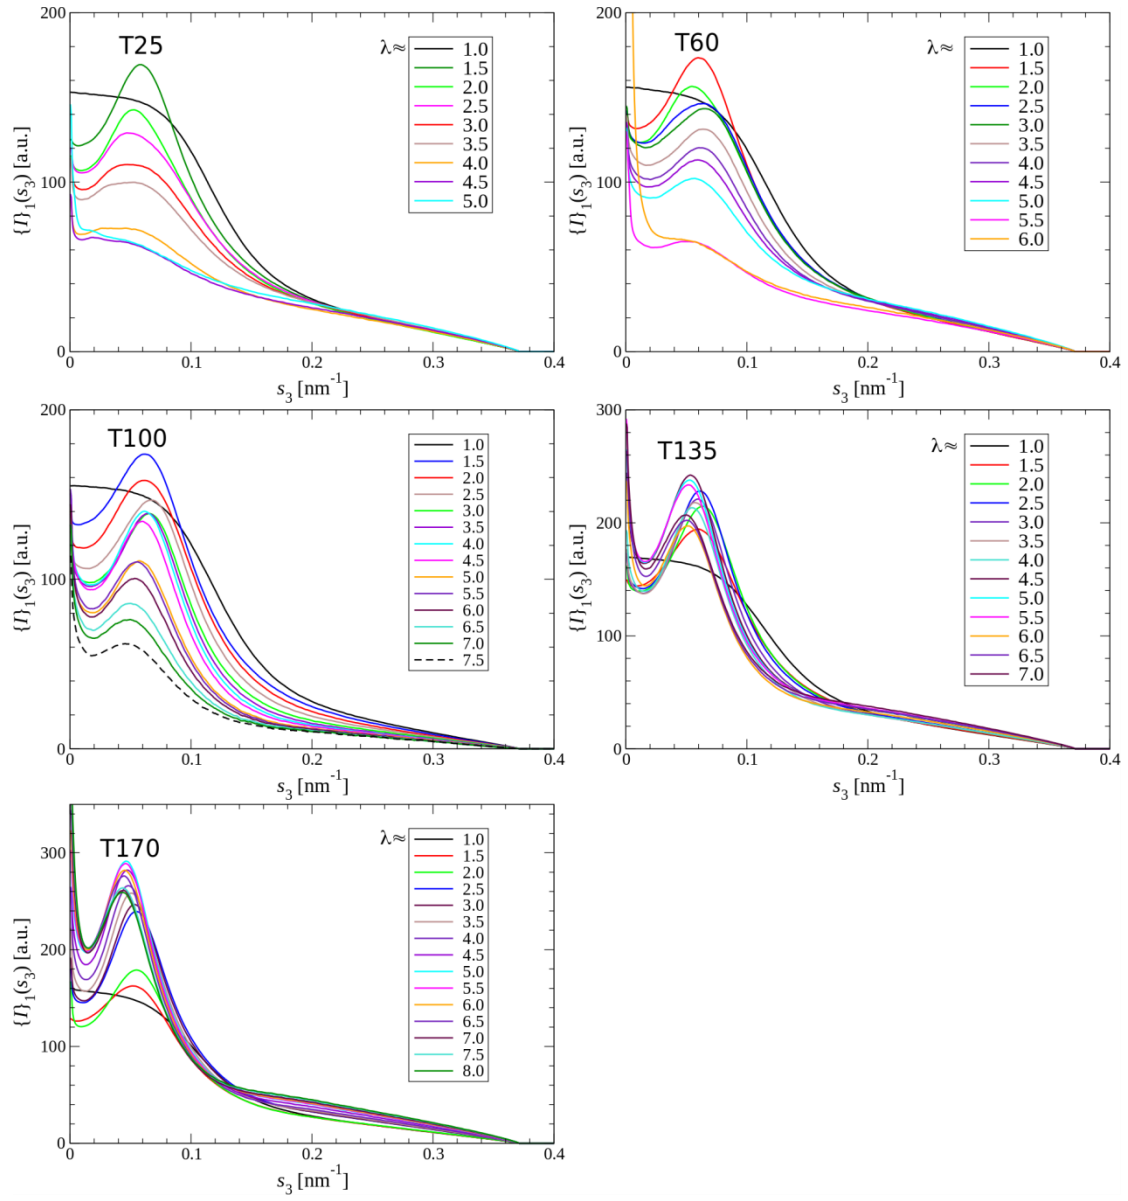

Figure S4: Vertical projection of SAXS pattern of sample H42 deformed at different temperatures varying as a function of elongation.

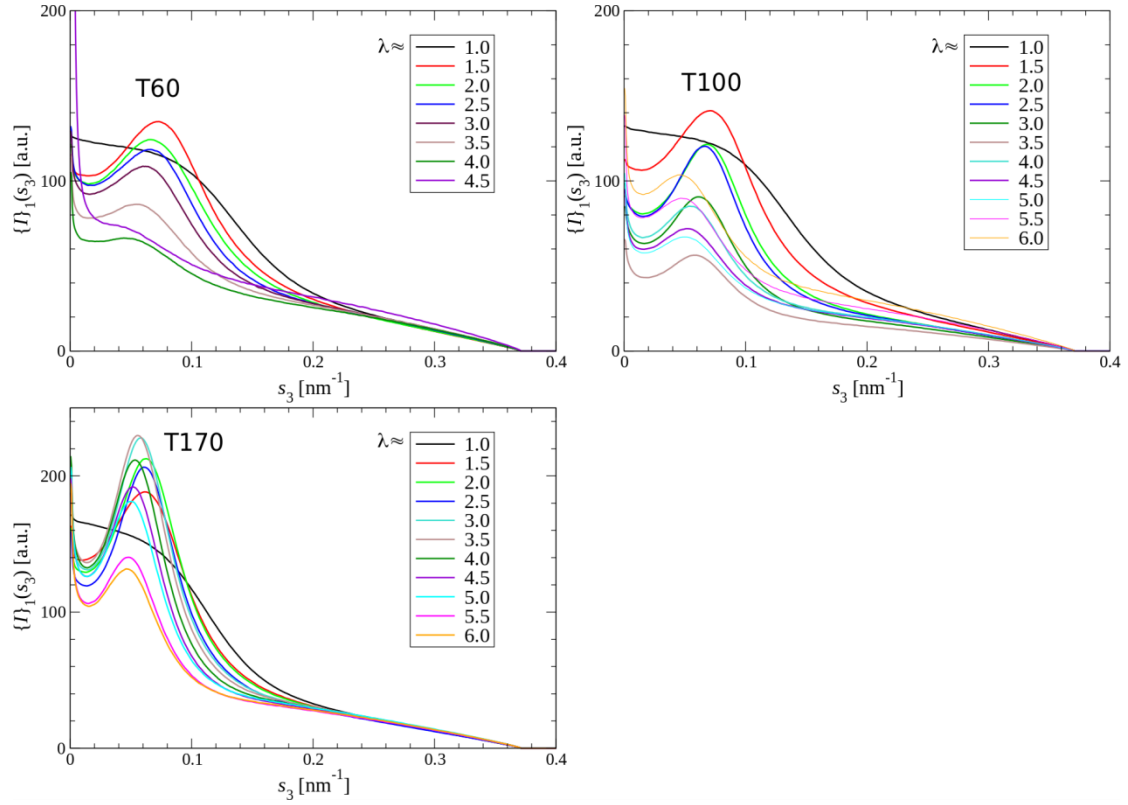

Figure S5: Vertical projection of SAXS pattern of sample H60 deformed at different temperatures varying as a function of elongation.

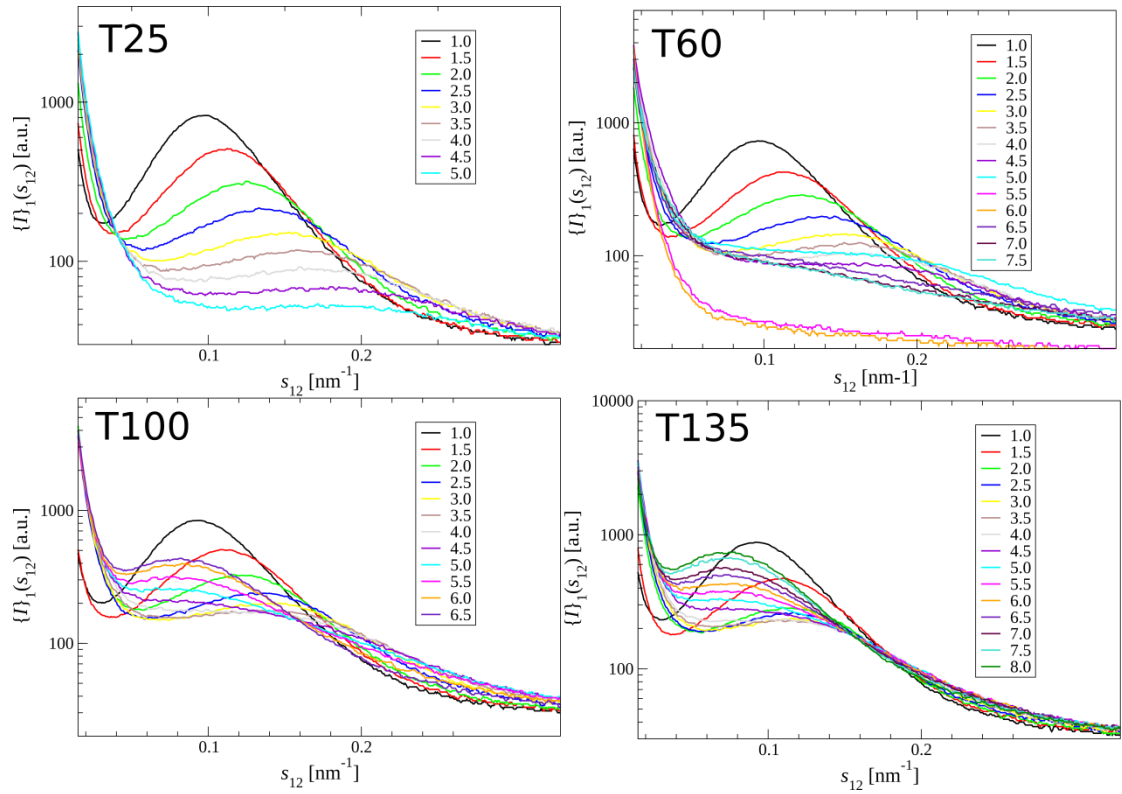

Figure S6: Horizontal projection of SAXS pattern of H29 deformed at different temperatures varying as a function of elongation.

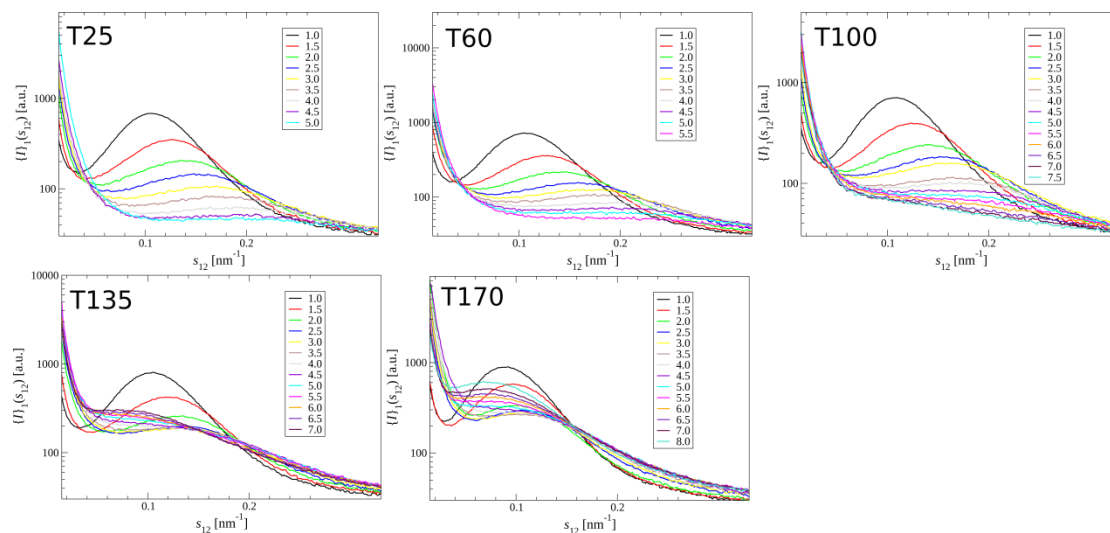

Figure S7: Horizontal projection of SAXS pattern of H42 deformed at different temperatures varying as a function of elongation.

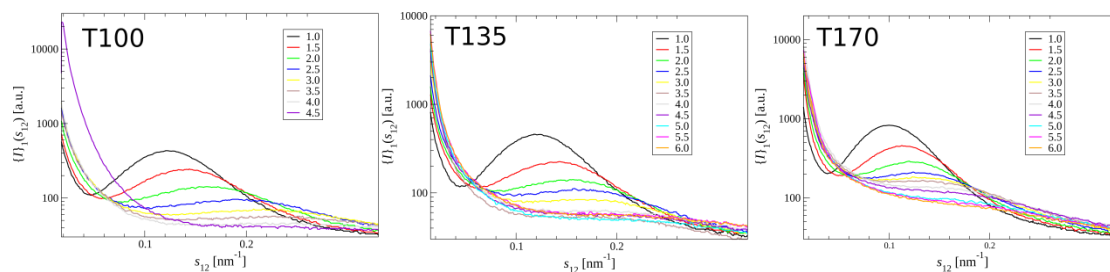

Figure S8: Horizontal projection of SAXS pattern of H60 deformed at different temperatures varying as a function of elongation.

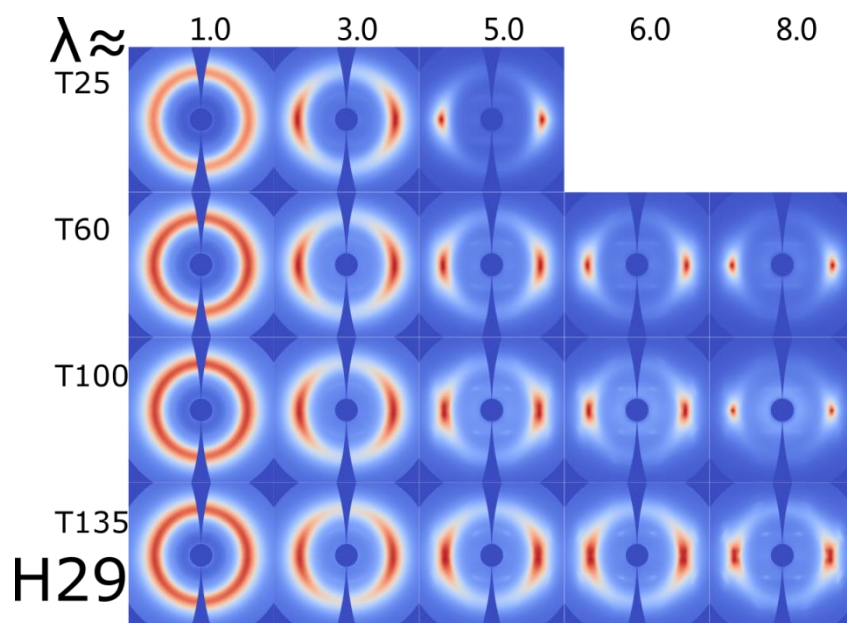

Figure S9: Selected WAXS patterns of H29 deformed at different temperatures. All WAXS patterns are projected onto the identical pseudo-color scale. The straining direction is vertical.

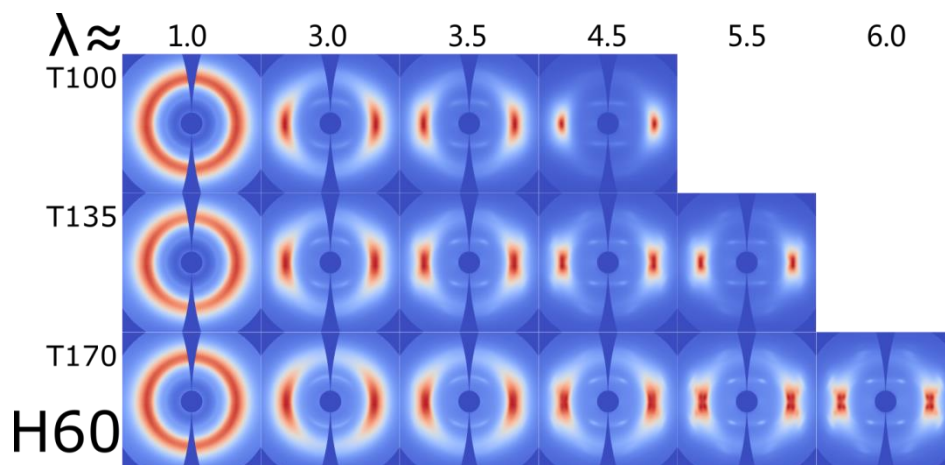

Figure S10: Selected WAXS patterns of H60 deformed at different temperatures. All WAXS patterns are projected onto the identical pseudo-color scale. The straining direction is vertical.

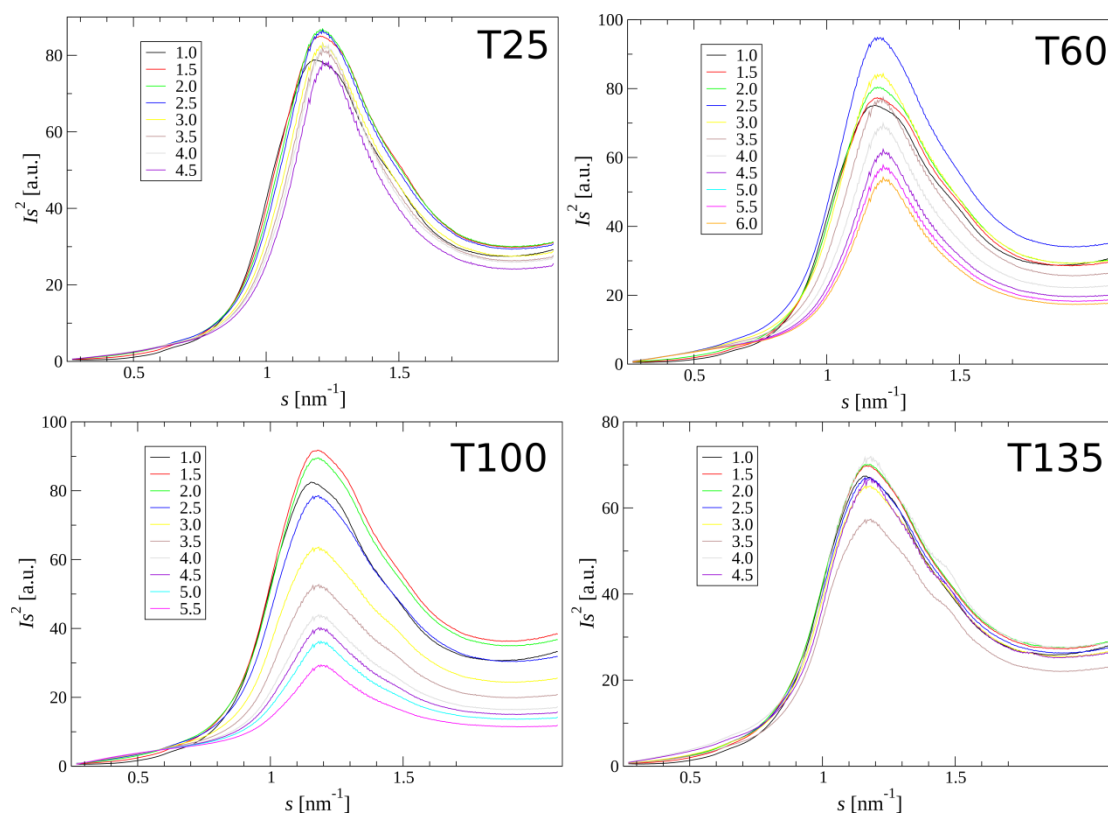

Figure S11: Spherical average<sup>1,2</sup> of WAXS pattern of H29 deformed at different temperatures as a function of elongation.



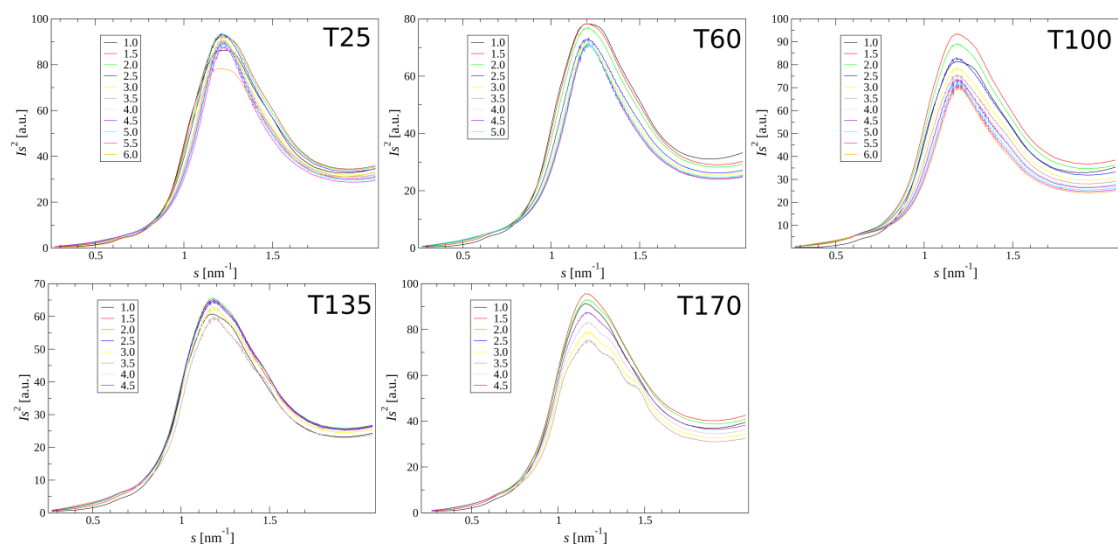

Figure S12: Spherical average of WAXS pattern of H42 deformed at different temperatures as a function of elongation.

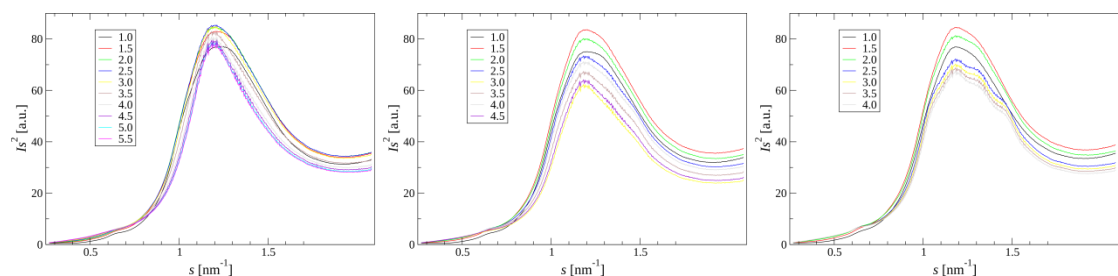

Figure S13: Spherical average of WAXS pattern of H60 deformed at different temperatures as a function of elongation.

Reference:

- (1) Ruland, W. Fourier Transform Methods for Random-Layer Line Profiles. *Acta Crystallogr.* **1967**, 22 (5), 615–623.
- (2) Stribeck, N. *X-Ray Scattering of Soft Matter*; Springer: Heidelberg, 2007. Page 130-131.
